# Supplementary material for: Thiol–ene click reaction: a new pathway to hydrophilic metal–organic frameworks for water purification
Source: Royal Society of Chemistry journal article supplement (doi:10.1039/d4lp00341a), 2025-01-01
Supplement: d4lp00341a1.pdf [file d4lp00341a1.pdf]

# Electronic Supplementary Information (ESI) for

## Thiol-Ene Click Reaction: A New Pathway to Hydrophilic Metal-Organic Frameworks for Water Purification

*Mingyuan Fang,<sup>a</sup> Riansares Muñoz-Olivas,<sup>b</sup> Carmen Montoro,<sup>c,d\*</sup> and Mona Semsarilar<sup>a,\*</sup>*

<sup>a</sup> Institut Européen des Membranes—IEM UMR 5635, Univ Montpellier, CNRS, ENSCM, 34095 Montpellier, France

<sup>b</sup> Departamento de Química Analítica, Universidad Complutense de Madrid, Ciudad Universitaria, 28040 Madrid, Spain

<sup>c</sup> Departamento de Química Inorgánica, Universidad Autónoma de Madrid, 28049, Madrid, Spain.

<sup>d</sup> Institute for Advanced Research in Chemical Sciences (IAdChem), Universidad Autónoma de Madrid, 28049 Madrid, Spain.

\*Correspondence: [carmen.montoro@uam.es](mailto:carmen.montoro@uam.es) (C.M.); [mona.semsarilar@umontpellier.fr](mailto:mona.semsarilar@umontpellier.fr) (M.S.)

**Table S1.** Summary of Zr-MSA PSM by click reactions.

| <b>Sample</b> | <b>PEG</b>         | <b>Catalyst or initiator</b> | <b>Physical aspect after click</b> |
|---------------|--------------------|------------------------------|------------------------------------|
| Zr-MSA-UV1    | PEG-acrylate-480   | DMPAP/UV                     | Suspension                         |
| Zr-MSA-UV2    | PEG-diacrylate-575 | DMPAP/UV                     | Gel                                |
| Zr-MSA-P1     | PEG-acrylate-480   | TBP                          | Suspension                         |
| Zr-MSA-P2     | PEG-diacrylate-575 | TBP                          | Suspension                         |

**Table S2.** Textural parameters for the Zr-MSA and the Zr-MSA modified by click reactions.

| <b>Sample</b> | <b>S<sub>BET</sub>, m<sup>2</sup> g<sup>-1</sup></b> | <b>Micropore volume, cm<sup>3</sup> g<sup>-1</sup></b> | <b>Total pore volume, cm<sup>3</sup> g<sup>-1</sup></b> |
|---------------|------------------------------------------------------|--------------------------------------------------------|---------------------------------------------------------|
| Zr-MSA        | 547                                                  | 0.146                                                  | 0.37                                                    |
| Zr-MSA-UV1    | 97                                                   | 0.018                                                  | 0.18                                                    |
| Zr-MSA-UV2    | 90                                                   | 0.015                                                  | 0.12                                                    |
| Zr-MSA-P1     | 232                                                  | 0.05                                                   | 0.22                                                    |
| Zr-MSA-P2     | 269                                                  | 0.06                                                   | 0.27                                                    |

### Digestion of PEG clicked Zr-MSA

10 mg of each sample were added into an eppendorf with 0.4 mL of DMSO-d<sub>6</sub>. Then, 50 μL of HF and 0.1 mL of D<sub>2</sub>O were added to the mixture. The mixture was sonicated for 2 minutes and kept at room temperature for 2 hours. The supernatant was analyzed by <sup>1</sup>H NMR.

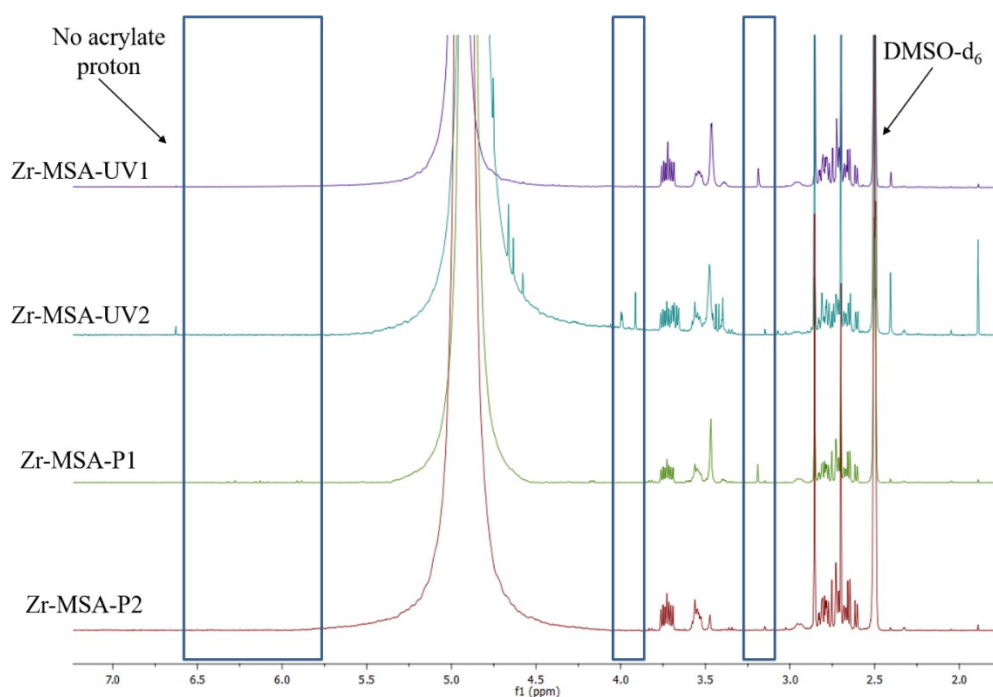

**Figure S1.** <sup>1</sup>H NMR spectrum of Zr-MSA-UV1, Zr-MSA-UV2, Zr-MSA-P1 and Zr-MSA-P2 (from top to the bottom) after digestion in HF.

No acrylate signals could be found at the region between 6 and 6.5 ppm. Indicating that all the PEG was attached to the thiols of the MOF structure. A singlet signal around 3.2 ppm could be seen in Zr-MSA-UV1 and Zr-MSA-P1 indicating the protons of the methyl (CH<sub>3</sub>) in the PEG-acrylate-480. For Zr-MSA-UV2, signals around 4 ppm were attributed to CH<sub>2</sub>-CH<sub>2</sub> that appeared after the click reaction. Note that these signals were between the multi signals of MOF linker, the PEG CH<sub>2</sub> signals (from 3.4 to 3.8 ppm) and the broad intense signal of HF (4.8 to 5.6). This leads to an underestimation of the number of clicked PEG-diacrylate-575, explaining difference between the figures estimated from TGA and NMR data. The wt. % amount of PEG was calculated using the theoretical Zr-MSA formula; Zr<sub>6</sub>O<sub>4</sub>(OH)<sub>4</sub>(MSA)<sub>6</sub>.

H NMR shifts of MSA and PEG back bone;

MSA:  $\text{HOOCCH}(\text{SH})\text{CH}_2\text{COOH}$ , 2.6- 2.8 ppm;  $\text{HOOCCH}(\text{SH})\text{CH}_2\text{COOH}$ , 3.57 ppm;

$\text{HOOCCH}(\text{SH})\text{CH}_2\text{COOH}$ , 3.29 ppm

PEG:  $\text{---}(\text{CH}_2\text{CH}_2\text{O})_n\text{CH}_2\text{CH}_2\text{---}$ , 3.4- 3.8 ppm;  $\text{---}(\text{CH}_2\text{CH}_2\text{O})_n\text{CH}_2\text{CH}_2\text{---}$ , 3.6 ppm;  $\text{---}$

$(\text{CH}_2\text{CH}_2\text{O})_n\text{CH}_2\text{CH}_2\text{---}$ , 4.2 ppm

**Table S3.** Amount of clicked PEG (wt. %) calculated using TGA and  $^1\text{H}$  NMR after digestion in HF.

| Sample     | PEG                | PEG (wt. %) |                  |
|------------|--------------------|-------------|------------------|
|            |                    | TGA         | $^1\text{H}$ NMR |
| Zr-MSA-UV1 | PEG-acrylate-480   | 2           | 3.8              |
| Zr-MSA-UV2 | PEG-diacrylate-575 | 23          | 7.3              |
| Zr-MSA-P1  | PEG-acrylate-480   | 0.5         | 2.9              |
| Zr-MSA-P2  | PEG-diacrylate-575 | 0.5         | NA               |

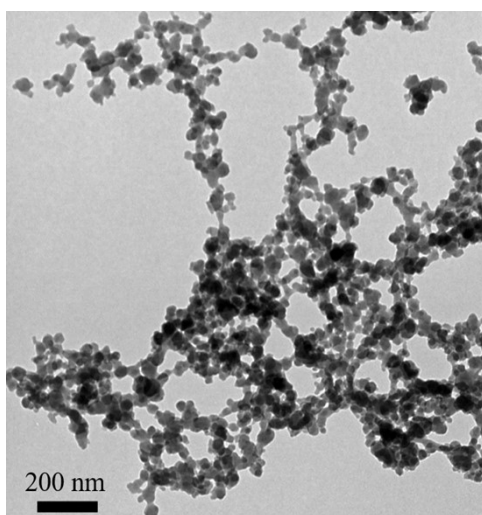

**Figure S2.** TEM image of Zr-MSA.

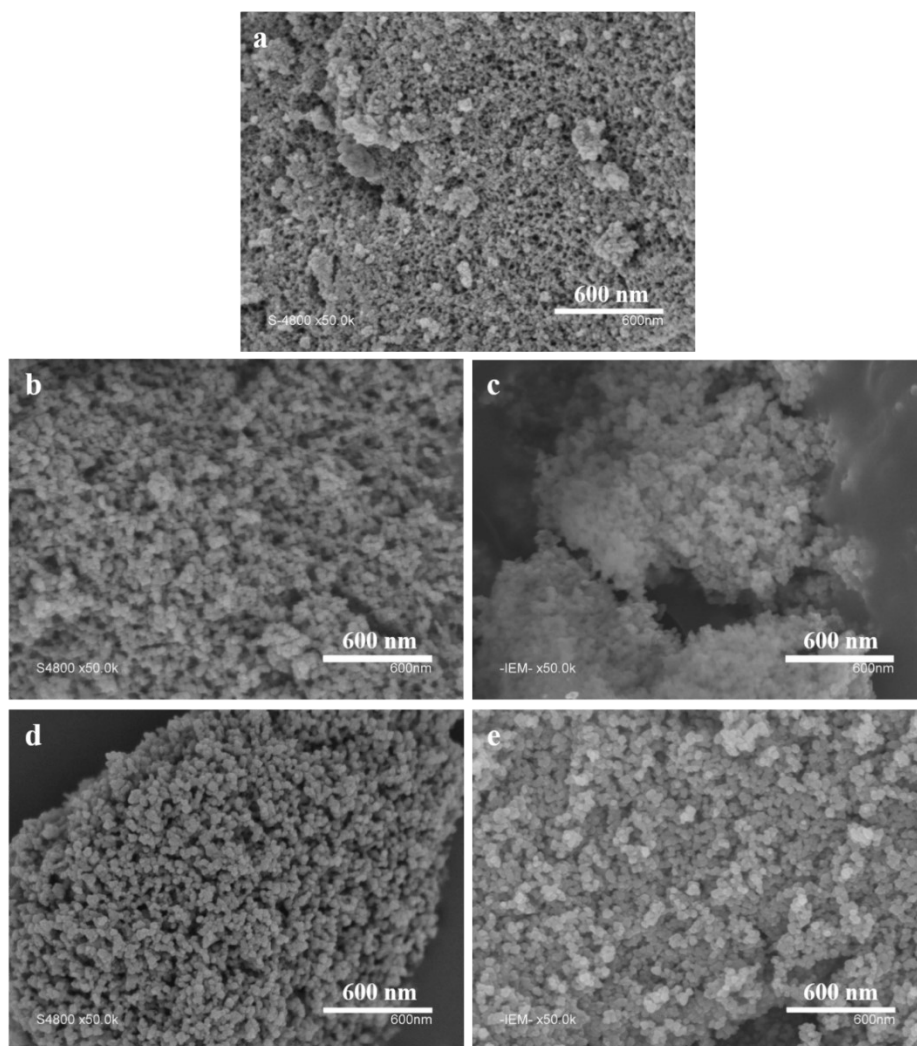

**Figure S3.** SEM (a) Zr-MSA, (b) Zr-MSA-UV1, (c) Zr-MSA-UV2, (d) Zr-MSA-P1 and (e) Zr-MSA-P2

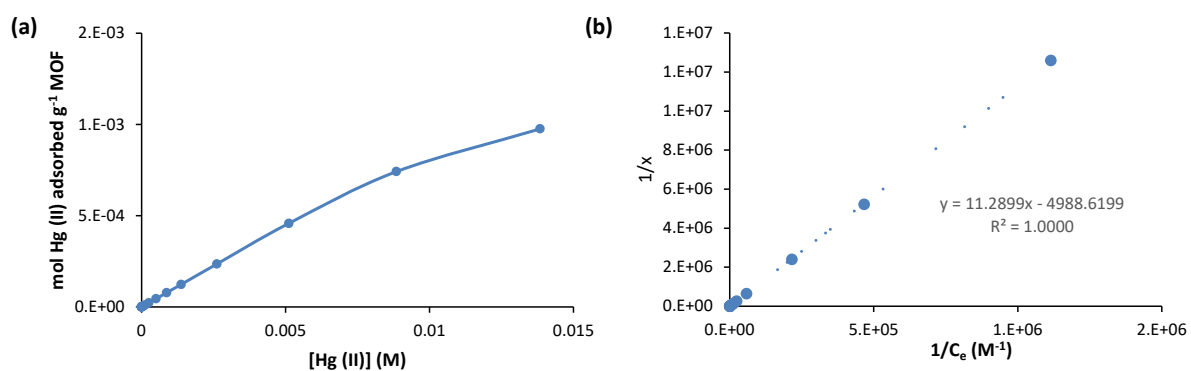

**Figure S4.** (a) Hg (II) adsorption isotherm for Zr-MSA-UV2 and (b) linear regression by fitting the equilibrium adsorption data with the Langmuir adsorption model.

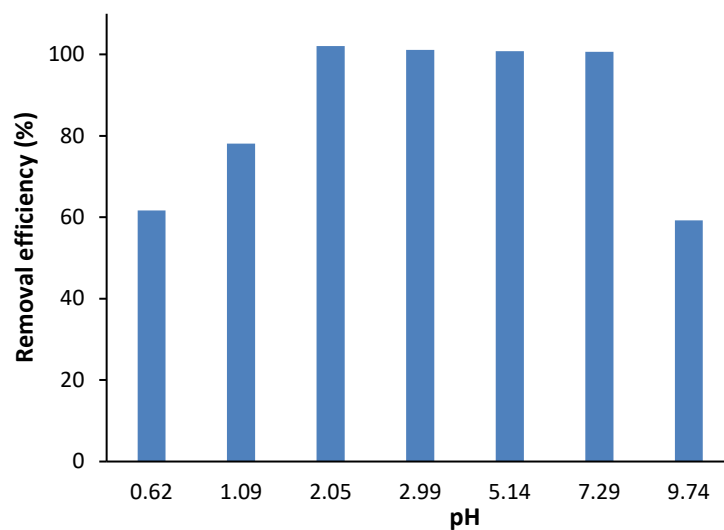

**Figure S5.** Removal efficiency of Hg (II) by Zr-MSA-UV2 under different pH conditions.

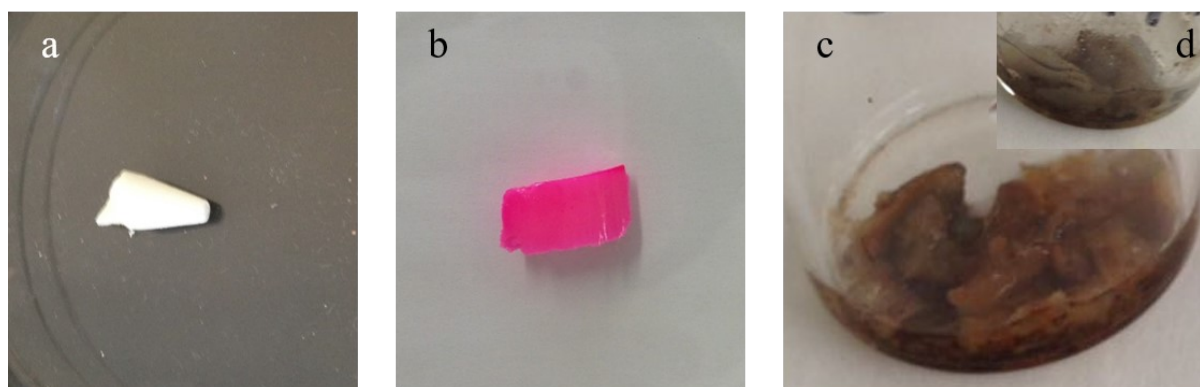

**Figure S6.** (a) Zr-MSA-UV2 gel, (b) Zr-MSA-UV2 gel after RhB adsorption, (c) Zr-MSA-UV2 gel after Cr adsorption, (d) Cr absorbed Zr-MSA-UV2 gel after 2 days.
